# Supplementary material for: A Co-Delivery System of Curcumin and p53 for Enhancing the Sensitivity of Drug-Resistant Ovarian Cancer Cells to Cisplatin
Source: PubMed Central journal article supplement (PMC7321199; doi:10.3390/molecules25112621), 2020-06-04
Supplement: molecules-25-02621-s001.pdf [file molecules-25-02621-s001.pdf]

## SUPPLEMENTARY MATERIALS

### **A co-delivery system of curcumin and p53 for enhancing the sensitivity of drug-resistant ovarian cancer cells to cisplatin**

**Xinli Guo, Zhou Fang, Min Zhang, Deyu Yang, Shuyue Wang and Kehai Liu \***

Department of Biopharmaceutics, School of Food Science and Technology, Shanghai Ocean University, Shanghai 201306, China; [gxlps@163.com](mailto:gxlps@163.com) (X. G.); [fangzhou0117@163.com](mailto:fangzhou0117@163.com) (Z.F.); [626250257@qq.com](mailto:626250257@qq.com) (M.Z.); [2651999212@qq.com](mailto:2651999212@qq.com) (D.Y.); [534558644@qq.com](mailto:534558644@qq.com) (S.W.)

\* Correspondence: [khliu@shou.edu.cn](mailto:khliu@shou.edu.cn); Tel.: +86-216-190-0388 (K.L.)

## SUPPLEMENTARY MATERIALS CONTENT

**Figure S1.** SEM image of CUR-PEI-K14 polymers.

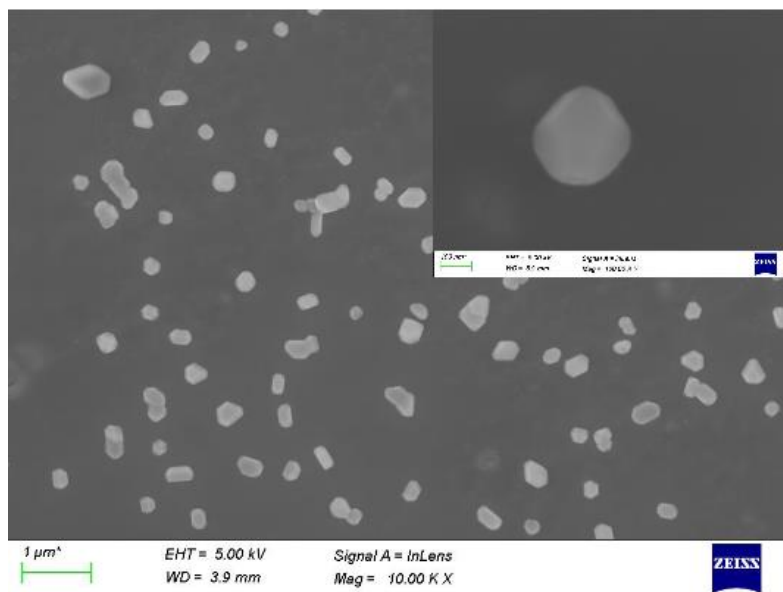

**Figure S1.** SEM image of CUR-PEI-K14 polymers.
